# Supplementary figures and images for: HPLC based single-step kinetic assay to screen the activity of DNAzymes
Source: Royal Society of Chemistry journal article supplement (doi:10.1039/c6ay03061k), 2017-01-01

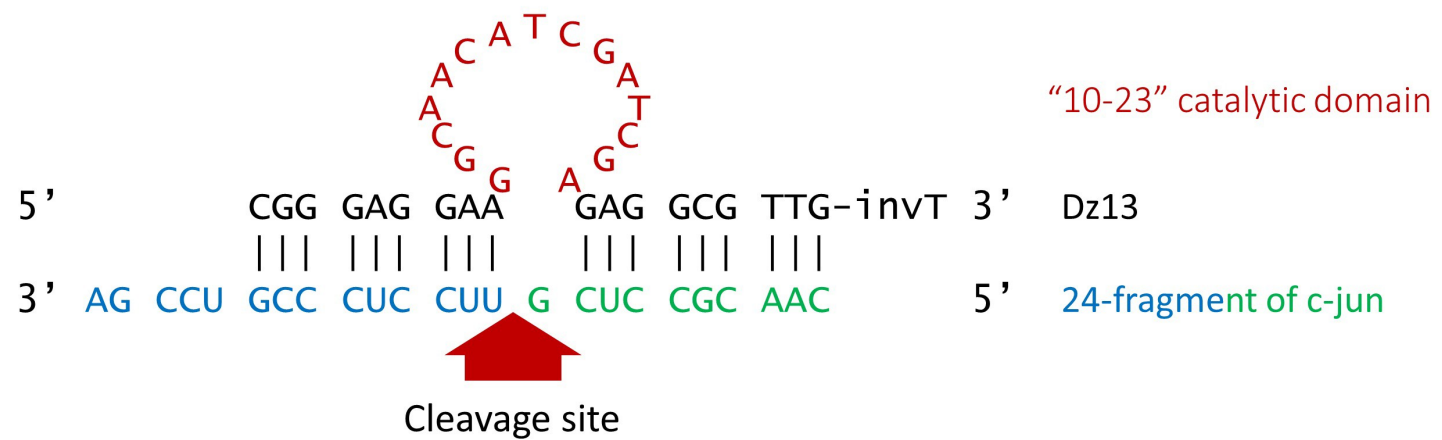

Supplement: c6ay03061k1.pdf [file c6ay03061k1.pdf]
